# Supplementary material for: Flagellin Inhibits HIV Infection of Macrophages through Modulation of Viral Entry Receptors and CC Chemokines
Source: Preprints.org preprint supplement (doi:10.20944/preprints202405.1446.v1), 2024-05-22
Supplement: Supplementary file 1 [file supplementary]

**Supplementary data**


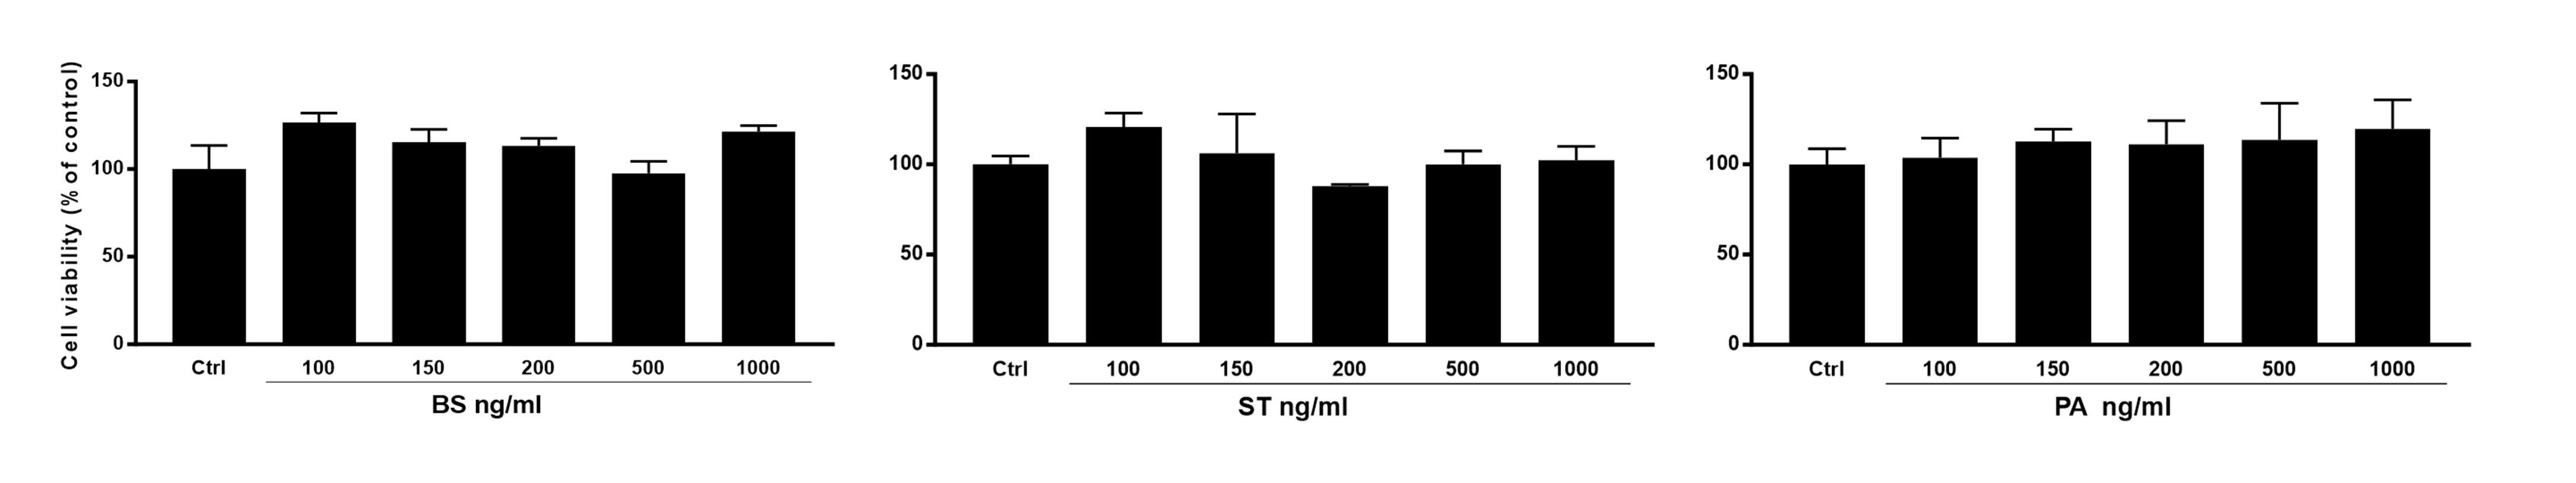


**Figure S1.** The cytotoxicity effect of flagellin on monocyte-derived macrophages (MDMs). MDMs were treated with the flagellins from three different bacteria (BS: Bacillus Subtilis; ST: Salmonella Typhimurium, and PA: Pseudomonas Aeruginosa) at the indicated concentrations for 72h. The cell viability was assessed by MTS assays. Data are shown as the absorbance (490 nm).
